# Supplementary material for: Simulating the effect of flowering time on maize individual leaf area in contrasting environmental scenarios
Source: PubMed Central journal article supplement (PMC7501815; doi:10.1093/jxb/eraa278), 2020-06-11
Supplement: eraa278_suppl_supplementary_material.pdf [file eraa278_suppl_supplementary_material.pdf]

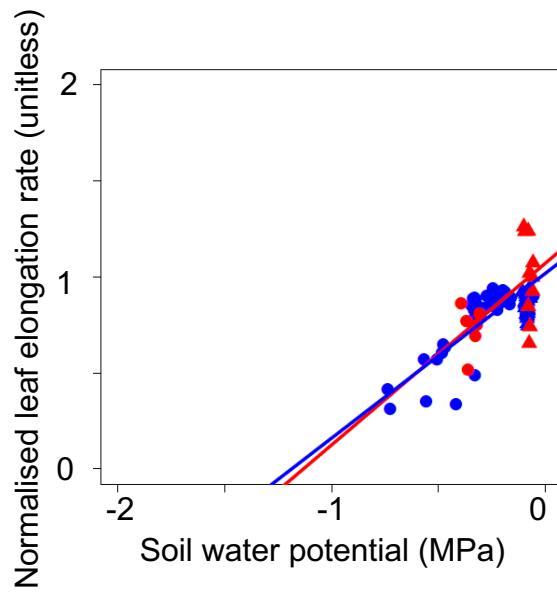

**Supplementary Figure S1.** Sensitivity of leaf elongation rate to soil water potential at single leaf level (Phenodyn platform, red) or sensitivity of leaf expansion rate at whole plant level (PhenoArch platform, blue). Both were normalized by the maximum value, in well watered soil.

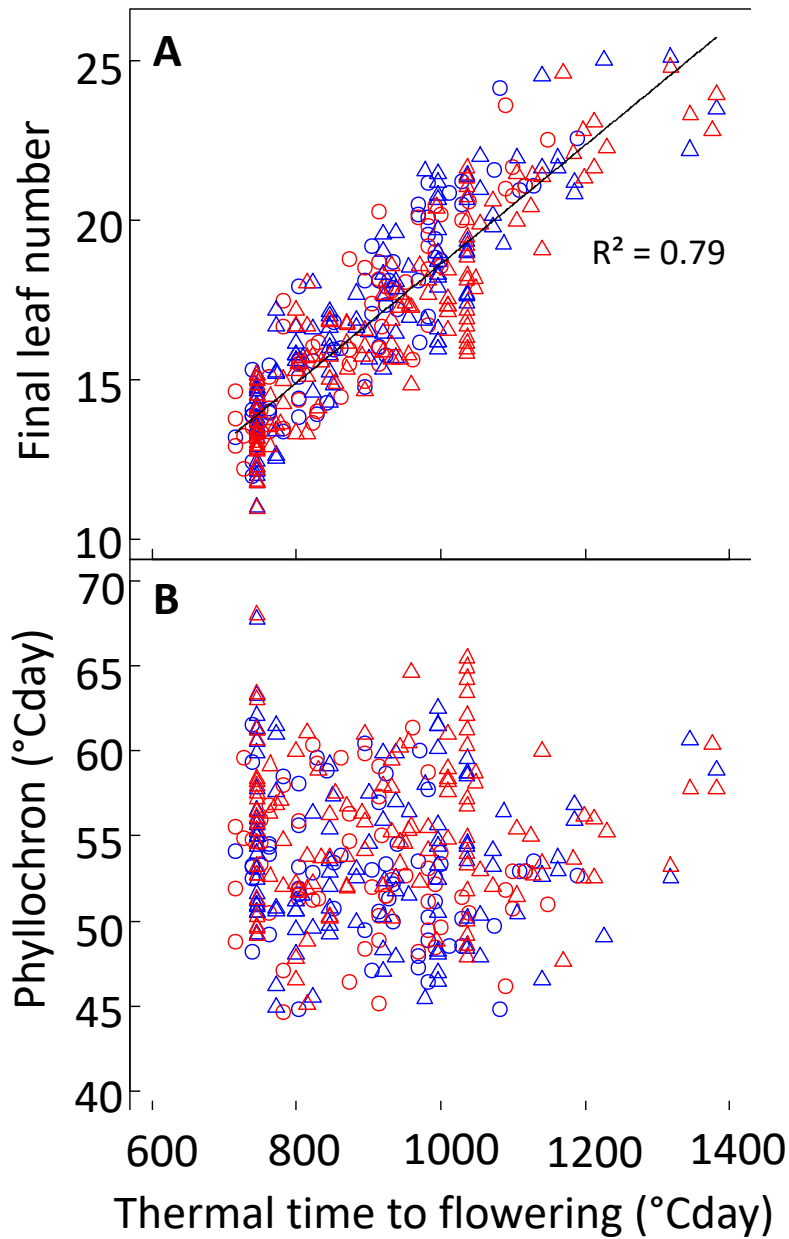

**Supplementary Figure S2.** Relationship between the thermal time from emergence to flowering and (A) the final leaf number or (B) the phyllochron for 114 maize lines in two field sites (circles : Le Magneraud; triangles : Sainte Pexine, Dataset B) under well watered (blue dots) or water deficit (red dots). A. Black line, linear regression performed on the whole dataset (Final leaf number =  $0.0186$  thermal time +  $0.044$ ).

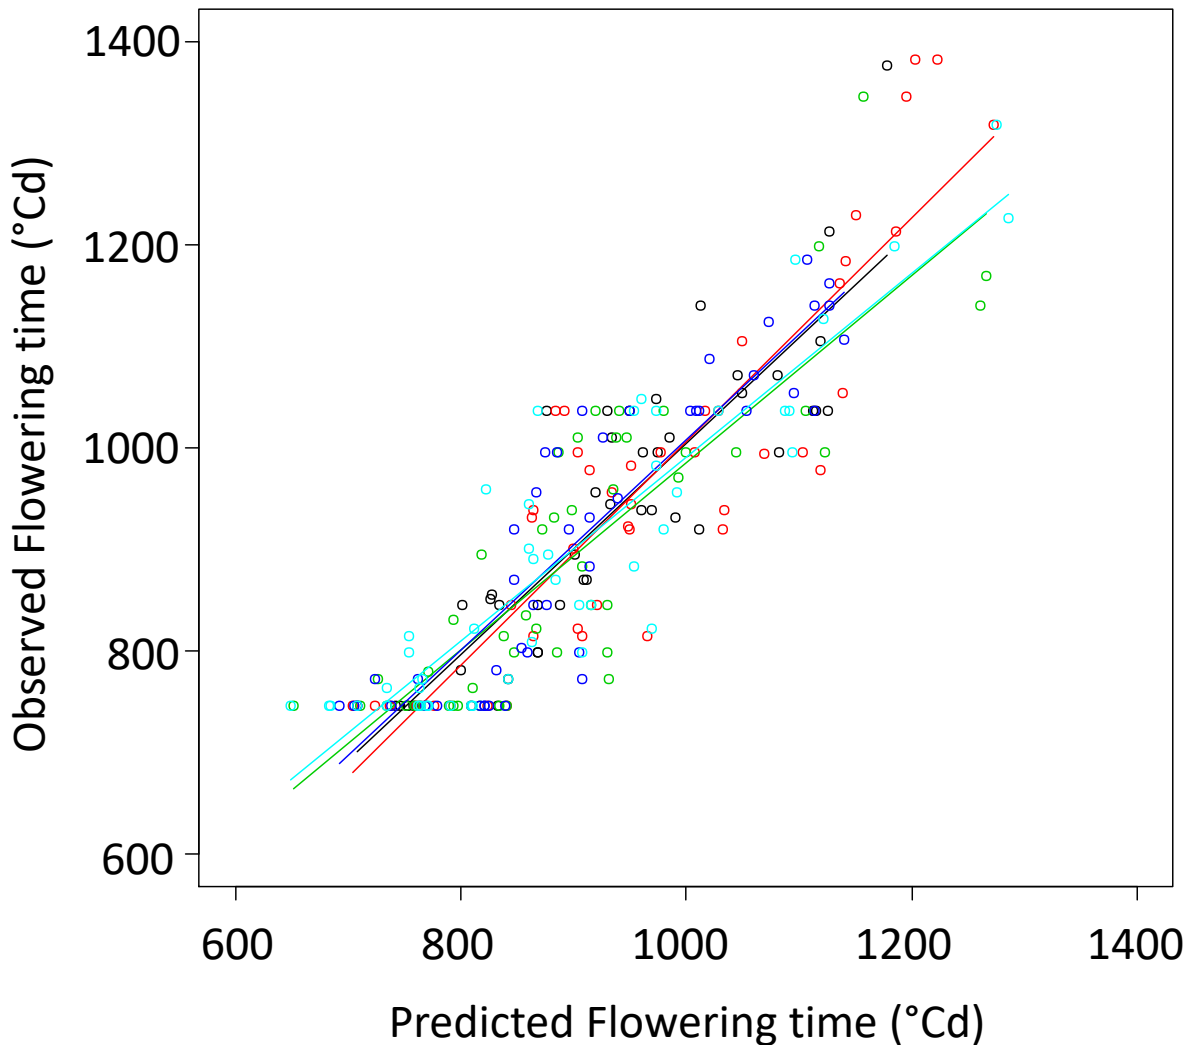

**Supplementary Figure S3.** Cross validation of prediction of flowering time from final leaf number. The full dataset of Figure 1 (119 genotypes grown in two watering conditions) was randomly subdivided into five subsets comprising 23-24 genotypes in well watered and water deficit conditions. Flowering time in each subset was predicted from the linear regression between final leaf number and flowering time, whose equation was obtained based on the other four other subsets. Dots display predicted and observed values and lines display their linear regression in each subset (five different colors for five subsets).

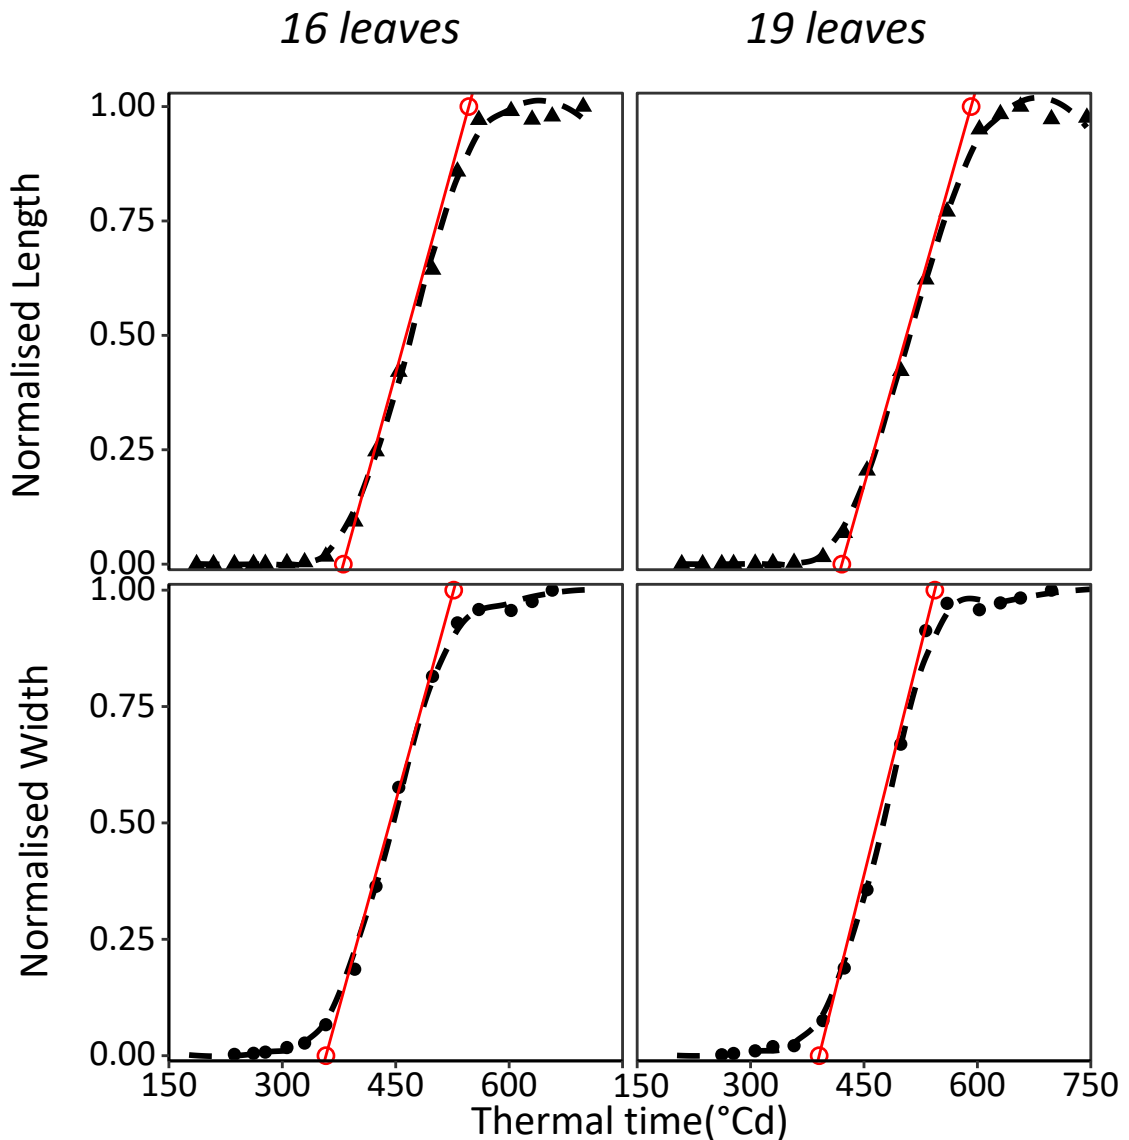

**Supplementary Figure S4.** Time courses of leaf length and width of leaf 6 for two maize hybrids with different final leaf numbers (dataset A, Table 1). Black dots, observed values ( $n= 10$ ) measured destructively every second day. Black dashed curves are fitted with a smoothing function `loess()` in R (Span = 0.5). Red lines are the linear models fitted between the beginning and end of elongation and widening, estimated from smoothed curves as the 5% and 95% of final dimensions.

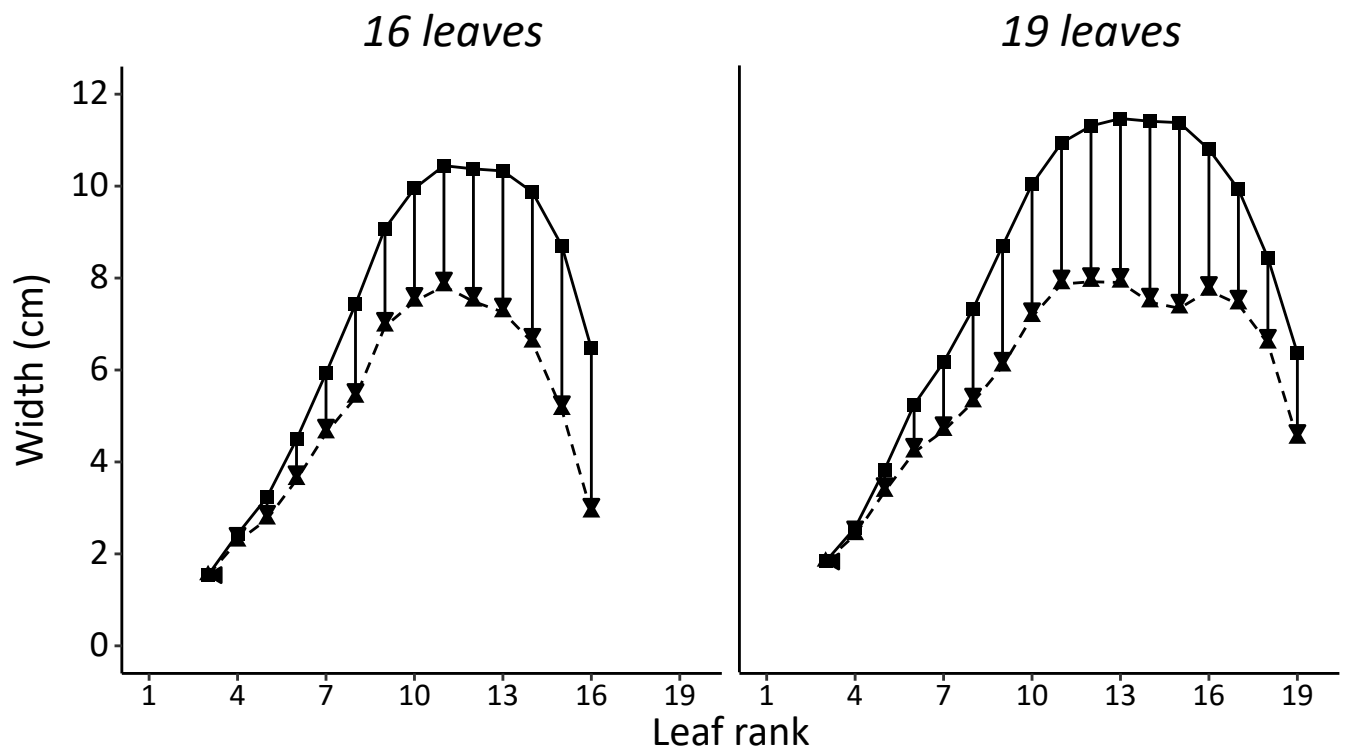

**Supplementary Figure S5.** Profiles of leaf width for two maize hybrids with different final leaf numbers (dataset A, Table 1). Squares, observed values ( $n= 10$ ). Triangles, calculated width for a intercepted light of  $1.5 \text{ MJ m}^{-2} \text{ d}^{-1}$  during the period of widening of the corresponding leaf, i.e. removing the effect of intercepted light from observed data.

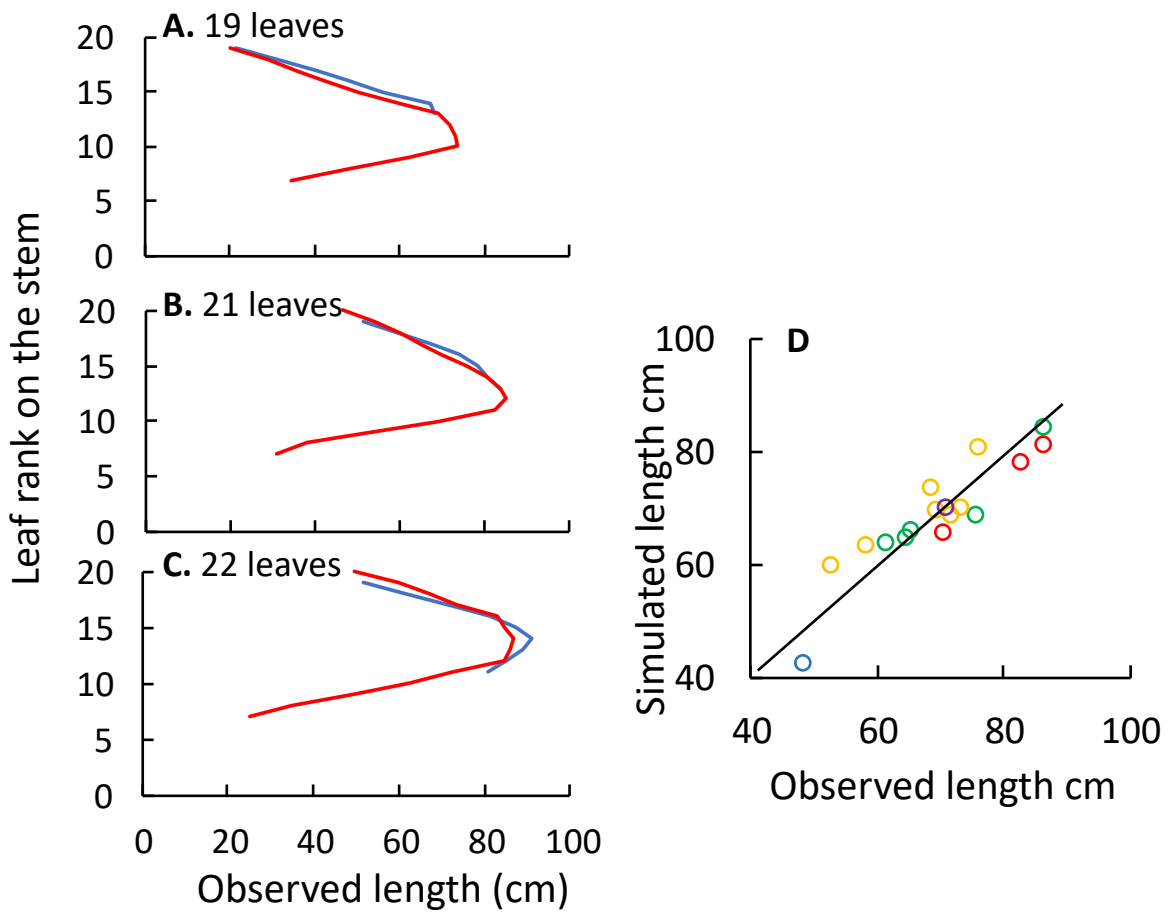

**Supplementary Fig S6.** Distributions of leaf length along leaf ranks on the stem, observed (blue) vs simulated (red) in dataset G (Mexico). A, line 214 with a final leaf number of 19; B, line 114 with a final leaf number of 21; C, line 35 with a final leaf number of 22. D, observed vs simulated lengths for 17 hybrids, mean values for leaves 15-17; blue, green orange, red and purple dots, plants with a final leaf number of 19, 20, 21 22 and 23, respectively; black line, 1:1 line.  $r^2 = 0.83$ . Model parameters for each line are below.

| Genotype | Model parameters                   |                                               |                                               |                            |
|----------|------------------------------------|-----------------------------------------------|-----------------------------------------------|----------------------------|
|          | $a_6$<br>mm. $^{\circ}$ Cd $^{-1}$ | $b$<br>mm. $^{\circ}$ Cd $^{-1}$ .kPa $^{-1}$ | $c$<br>mm. $^{\circ}$ Cd $^{-1}$ .MPa $^{-1}$ | $N_{\text{final}}$<br>leaf |
| 10       | 4.69                               | -1.28                                         | 4.16                                          | 22                         |
| 25       | 4.22                               | -1.08                                         | 4.48                                          | 21                         |
| 38       | 3.99                               | -0.96                                         | 4.65                                          | 21                         |
| 40       | 3.58                               | -1.01                                         | 3.19                                          | 22                         |
| 63       | 4.83                               | -1.49                                         | 5.05                                          | 20                         |
| 82       | 3.95                               | -0.96                                         | 3.60                                          | 20                         |
| 95       | 4.04                               | -1.13                                         | 4.32                                          | 21                         |
| 114      | 3.09                               | -0.90                                         | 2.72                                          | 21                         |
| 119      | 3.52                               | -1.00                                         | 3.42                                          | 21                         |
| 123      | 4.10                               | -1.30                                         | 4.87                                          | 23                         |
| 139      | 3.27                               | -0.89                                         | 4.11                                          | 20                         |
| 156      | 4.60                               | -1.38                                         | 4.61                                          | 20                         |
| 170      | 4.08                               | -0.90                                         | 5.02                                          | 21                         |
| 177      | 3.79                               | -1.19                                         | 3.75                                          | 20                         |
| 208      | 3.81                               | -0.84                                         | 4.06                                          | 22                         |
| 214      | 3.65                               | -0.98                                         | 3.80                                          | 19                         |
| 245      | 4.75                               | -1.12                                         | 4.95                                          | 21                         |

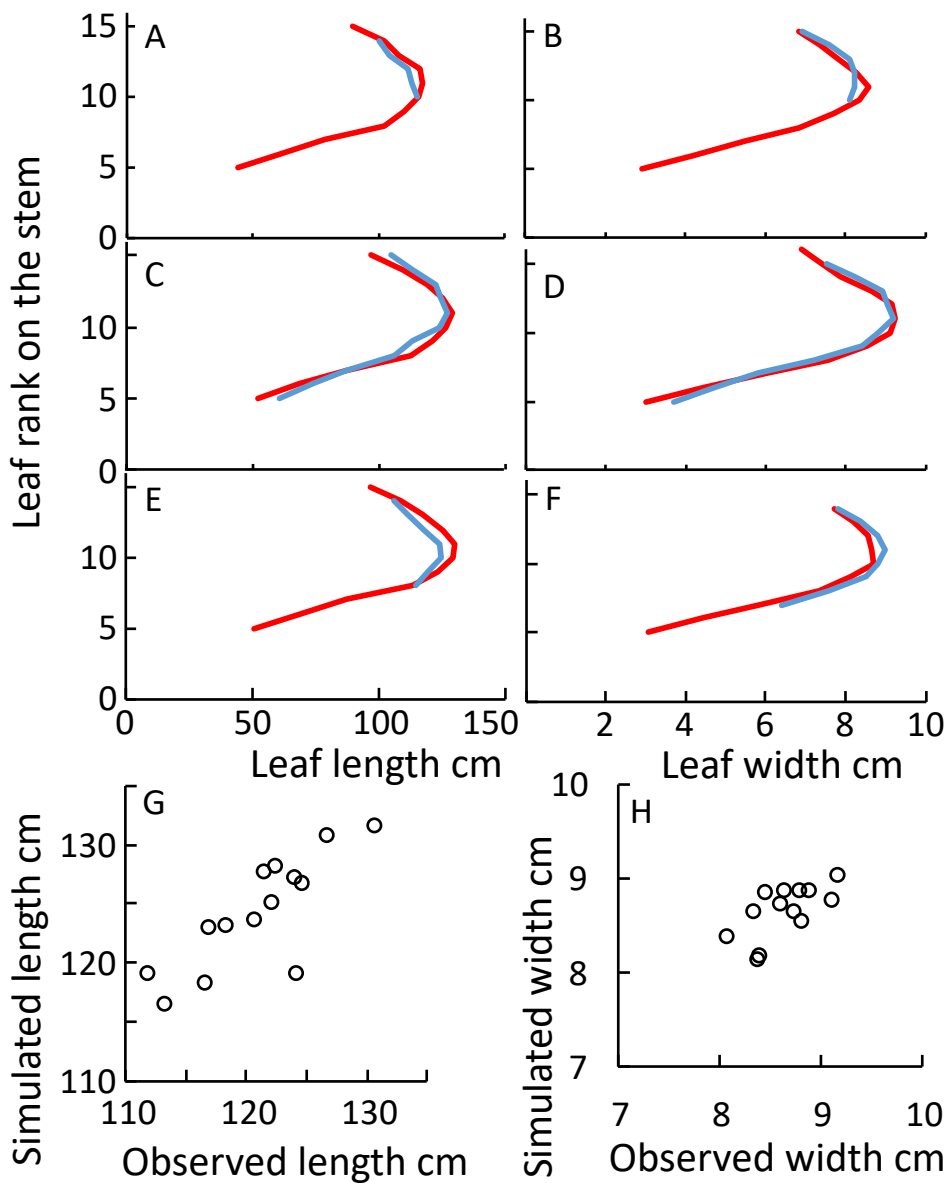

**Supplementary Figure S7.** Observed (red) and simulated (blue) distributions of final leaf length and width for the maize hybrid B73 x UH007, in 14 field experiments (Dataset E, Table1, details in SI Table S2) with contrasting evaporative demand and light intensities (SI Table S2) in Caracal 2012 (A,B), Mauguio 2011 (C,D) and Karlsruhe 2013. (E,F) G, observed vs simulated lengths for all sites, mean values for leaves 9-11; H observed vs simulated widths, mean values for leaves 9-11. In G,  $r^2=0.66$ ; in H  $r^2 = 0.44$ .

**Supplementary Table S1 . Summary of field trials of dataset B**

| Site                 | Year | ID    | Latitude<br>(°N) | Longitude<br>(°E) | Altitude<br>(m) | T <sub>max</sub><br>(°C) | T <sub>min</sub><br>(°C) | T <sub>mean</sub><br>(°C) | VPD <sub>max</sub><br>(kPa) | RAD <sub>sum</sub><br>(MJ/m <sup>2</sup> ) | Number of<br>genotypes | Precocity<br>range |
|----------------------|------|-------|------------------|-------------------|-----------------|--------------------------|--------------------------|---------------------------|-----------------------------|--------------------------------------------|------------------------|--------------------|
| Kiboko, Kenya        | 2007 | KI07p | 2,3              | 37,8              | 915             | 24,2                     | 11,3                     | 17,7                      | 1,1                         | 2958                                       | 6                      | 19 - 21            |
| Le Magneraud, France | 2007 | LM07  | 46,8             | 0,75              | 25              | 21,5                     | 12,1                     | 16,8                      | 1,2                         | 2717                                       | 56                     | 12 - 25            |
| Mauguio, France      | 2007 | MA07  | 43,61            | 3,98              | 13              | 24,7                     | 15,4                     | 20,0                      | 1,7                         | 3231                                       | 104                    | 12 - 16            |
| Nerac, France        | 2006 | NR06  | 44,17            | 0,31              | 40              | 21,4                     | 13,2                     | 17,3                      | 1,6                         | 2788                                       | 117                    | 14 - 29            |
| Tlaltizapan, Mexico  | 2007 | TL07p | 18,41            | 99,1              | 940             | 29,3                     | 16,8                     | 23,1                      | 1,2                         | 2142                                       | 6                      | 19 - 21            |

All environmental variables are calculated in the period between sowing and ligulation of the last leaf for the reference genotype B73\_H. T<sub>max</sub> : Mean of daily maximum temperature. T<sub>min</sub> : mean of daily minimum temperature. T<sub>mean</sub> : mean of T<sub>max</sub> and T<sub>min</sub> . VPD<sub>max</sub> : mean of daily maximum vapor pressure deficit. RAD<sub>sum</sub> : sum of daily radiation.



**Supplementary Table S2.** Presence of each genotype in each field trial for dataset B.

| Genotype | Origin* | KI07p | LM07 | MA07 | NR06 | TL07p | Genotype | Origin* | KI07p | LM07 | MA07 | NR06 | TL07p | Genotype | Origin* | KI07p | LM07 | MA07 | NR06 | TL07p |
|----------|---------|-------|------|------|------|-------|----------|---------|-------|------|------|------|-------|----------|---------|-------|------|------|------|-------|
| K64R     | S-Trop  | X     | X    |      |      | X     | LMGC90   | Temp    |       | X    | X    | X    |       | W103     | Temp    |       |      |      | X    | X     |
| CML245   | S-Trop  | X     |      | X    |      | X     | FC1852   | Temp    |       | X    | X    | X    |       | FV344    | Temp    |       |      |      | X    | X     |
| CML247   | Trop    | X     |      |      |      | X     | FV252    | Temp    |       | X    |      | X    |       | FV232    | Temp    |       |      |      | X    | X     |
| KUI3     | Trop    | X     |      |      |      | X     | FC24     | Temp    |       | X    | X    | X    |       | FV72     | Temp    |       |      |      | X    | X     |
| H16      | Trop    | X     |      |      |      | X     | YUBR5    | Temp    |       | X    | X    | X    |       | EA1301   | Temp    |       |      |      | X    | X     |
| SCMALAWI | S-Trop  | X     |      |      | X    | X     | W117U    | Temp    |       | X    | X    | X    |       | PLS14    | Temp    |       |      |      | X    | X     |
| F2834T   | Temp    |       | X    |      | X    |       | FC16     | Temp    |       | X    | X    | X    |       | CO158    | Temp    |       |      |      | X    | X     |
| B73-t    | Temp    |       | X    |      | X    |       | FV65     | Temp    |       | X    | X    | X    |       | WJ       | Temp    |       |      |      | X    | X     |
| L256     | Temp    |       | X    | X    | X    |       | FV76     | Temp    |       | X    | X    | X    |       | LMGC91   | Temp    |       |      |      | X    | X     |
| CI1872U  | Temp    |       | X    |      | X    |       | W85      | Temp    |       | X    | X    | X    |       | F7038    | Temp    |       |      |      | X    | X     |
| NC298    | Temp    |       | X    |      | X    |       | FV2      | Temp    |       | X    | X    | X    |       | FV4      | Temp    |       |      |      | X    | X     |
| KY21     | Temp    |       | X    |      | X    |       | FV71     | Temp    |       | X    | X    | X    |       | F7012    | Temp    |       |      |      | X    | X     |
| NC304    | Temp    |       | X    |      | X    |       | EP1      | Temp    |       | X    | X    | X    |       | CL18     | Temp    |       |      |      | X    | X     |
| NC320    | Temp    |       | X    |      | X    |       | FV75     | Temp    |       | X    | X    | X    |       | RAGT67   | Temp    |       |      |      | X    | X     |
| HP301    | Temp    |       | X    | X    | X    |       | F252-t   | Temp    |       | X    |      | X    |       | H99USA   | Temp    |       |      |      | X    | X     |
| OH43     | Temp    |       | X    |      |      |       | ND30     | Temp    |       | X    | X    | X    |       | PB57     | Temp    |       |      |      | X    | X     |
| B73      | Temp    |       | X    | X    |      |       | RAGT175  | Temp    |       | X    | X    | X    |       | F608     | Temp    |       |      |      | X    | X     |
| MO17     | Temp    |       | X    | X    | X    |       | FV7      | Temp    |       | X    | X    | X    |       | RAGT185  | Temp    |       |      |      | X    | X     |
| N25      | Temp    |       | X    | X    | X    |       | F252     | Temp    |       |      | X    | X    |       | P465P    | Temp    |       |      |      | X    | X     |
| LP35     | Temp    |       | X    | X    | X    |       | B106     | Temp    |       |      | X    | X    |       | Oh33     | Temp    |       |      |      | X    | X     |
| F64      | Temp    |       | X    | X    | X    |       | P9C056   | Temp    |       |      | X    | X    |       | Oh40B    | Temp    |       |      |      | X    | X     |
| ZN6      | Temp    |       | X    | X    | X    |       | PLS41    | Temp    |       |      | X    | X    |       | RAGT4    | Temp    |       |      |      | X    | X     |
| MBS-t    | Temp    |       | X    |      |      |       | ND36     | Temp    |       |      | X    | X    |       | LMGC88   | Temp    |       |      |      | X    | X     |
| LAN496   | Temp    |       | X    | X    | X    |       | PA374    | Temp    |       |      | X    | X    |       | F759     | Temp    |       |      |      | X    | X     |
| LMGC47   | Temp    |       | X    | X    | X    |       | C105     | Temp    |       |      | X    | X    |       | LO33     | Temp    |       |      |      | X    | X     |
| LMGC12   | Temp    |       | X    | X    | X    |       | F7001    | Temp    |       |      | X    | X    |       | F473     | Temp    |       |      |      | X    | X     |
| EA1712   | Temp    |       | X    | X    | X    |       | FC42     | Temp    |       |      | X    | X    |       | PLS6     | Temp    |       |      |      | X    | X     |
| N6       | Temp    |       | X    | X    | X    |       | A374     | Temp    |       |      | X    | X    |       | RAGT12   | Temp    |       |      |      | X    | X     |
| EA1433   | Temp    |       | X    | X    | X    |       | RAGT84   | Temp    |       |      | X    | X    |       | FV324    | Temp    |       |      |      | X    | X     |
| EA1201   | Temp    |       | X    | X    | X    |       | LMGC28   | Temp    |       |      | X    | X    |       | ND1      | Temp    |       |      |      | X    | X     |
| RAGT113  | Temp    |       | X    | X    | X    |       | EA1070   | Temp    |       |      | X    | X    |       | LMGC92   | Temp    |       |      |      | X    | X     |
| MBS847   | Temp    |       | X    | X    |      |       | LMGC93   | Temp    |       |      | X    | X    |       | CQ191    | Temp    |       |      |      | X    | X     |
| FC25     | Temp    |       | X    | X    | X    |       | RAGT127  | Temp    |       |      | X    | X    |       | FV74     | Temp    |       |      |      | X    | X     |
| NY302    | Temp    |       | X    | X    | X    |       | B104U    | Temp    |       |      | X    | X    |       | LMGC89   | Temp    |       |      |      | X    | X     |
| F591     | Temp    |       | X    | X    | X    |       | MO15W    | Temp    |       |      | X    | X    |       | EA1866   | Temp    |       |      |      |      | X     |
| FC209    | Temp    |       | X    | X    | X    |       | Oh43     | Temp    |       |      | X    | X    |       | MBS847-t | Temp    |       |      |      |      | X     |
| PB40R    | Temp    |       | X    | X    | X    |       | RAGT3    | Temp    |       |      | X    | X    |       | RAGT189  | Temp    |       |      |      |      | X     |
| LO3      | Temp    |       | X    | X    | X    |       | F48      | Temp    |       |      | X    | X    |       | TZ118    | Trop    |       |      |      |      | X     |
| EA1174   | Temp    |       | X    | X    | X    |       | FV230    | Temp    |       |      | X    | X    |       | GT112U   | Trop    |       |      |      |      | X     |
| BA90     | Temp    |       | X    | X    | X    |       | PA36     | Temp    |       |      | X    | X    |       | MO22     | Temp    |       |      |      |      | X     |
| F39      | Temp    |       | X    | X    | X    |       | LMGC80   | Temp    |       |      | X    | X    |       | A6       | Temp    |       |      |      |      | X     |
| F471     | Temp    |       | X    | X    | X    |       | ND283    | Temp    |       |      | X    | X    |       |          |         |       |      |      |      |       |
| CH10     | Temp    |       | X    | X    | X    |       | F712     | Temp    |       |      | X    | X    |       |          |         |       |      |      |      |       |

\* Trop : Tropical genotype. Sub-trop : sub-tropical genotype. Temp : temperate genotype.

**Supplementary Table S3.** Summary of experiments used for model parameterisation and validation

| Dataset | Location                               | Country | Year  | ID     | Latitude<br>(°N) | Longitude<br>(°E) | Altitude<br>(m) | Sowing date<br>(day) | Density<br>(plants.m <sup>-2</sup> ) | T <sub>max</sub><br>(°C) | T <sub>min</sub><br>(°C) | T <sub>mean</sub><br>(°C) | VPD <sub>max</sub><br>(kPa) | RAD <sub>sum</sub><br>(MJ/m <sup>2</sup> ) |
|---------|----------------------------------------|---------|-------|--------|------------------|-------------------|-----------------|----------------------|--------------------------------------|--------------------------|--------------------------|---------------------------|-----------------------------|--------------------------------------------|
| C       | Montpellier<br>(PhenoArch<br>platform) | France  | 2016  | Mon16  | 43,62            | 3,86              | 43              | 10/05/2016           | 11,0                                 | 25,1                     | 18,4                     | 21,7                      | 1,0                         | 1155                                       |
| D       | Saint Martin                           | France  | 2016  | StM16  | 43,57            | -1,3              | 4               | 17/05/2016           | 10,0                                 | 22,3                     | 12,8                     | 17,5                      | 2,1                         | 2359                                       |
| E       | Cadriano                               | Italy   | 2012  | Cad12  | 44,93            | 11,88             | 5               | 17/05/2012           | 6,3                                  | 24,3                     | 15,7                     | 20,0                      | 1,8                         | 3675                                       |
|         | Campagnola                             | Italy   | 2011  | Cam11  | 45,17            | 9,53              | 49              | 10/05/2011           | 6,4                                  | 23,2                     | 15,1                     | 19,1                      | 1,4                         | 3120                                       |
|         | Campagnola                             | Italy   | 2013  | Cam13  | 45,17            | 9,53              | 49              | 14/06/2013           | 5,7                                  | 22,8                     | 13,8                     | 18,3                      | 1,9                         | 2328                                       |
|         | Caracal                                | Romania | 2012  | Car12  | 44,12            | 24,35             | 101             | 21/05/2012           | 6,7                                  | 28,7                     | 14,2                     | 21,4                      | 1,8                         | 3315                                       |
|         | Karcag                                 | Hungary | 2011  | Karc11 | 47,18            | 20,54             | 81              | 13/05/2011           | 6,7                                  | 23,6                     | 11,7                     | 17,6                      | 2,0                         | 3060                                       |
|         | Karcag                                 | Hungary | 2012  | Karc12 | 47,18            | 20,54             | 81              | 21/05/2012           | 5,7                                  | 24,3                     | 11,8                     | 18,0                      | 1,7                         | 2820                                       |
|         | Karlsruhe                              | Germany | 2011  | Karl11 | 49,07            | 8,28              | 115             | 04/05/2011           | 8,2                                  | 20,5                     | 10,0                     | 15,2                      | 1,5                         | 2595                                       |
|         | Karlsruhe                              | Germany | 2012  | Karl12 | 49,07            | 8,28              | 115             | 11/05/2012           | 8,2                                  | 19,8                     | 10,1                     | 14,9                      | 1,4                         | 2520                                       |
|         | Karlsruhe                              | Germany | 2013  | Karl13 | 49,07            | 8,28              | 100             | 20/05/2013           | 8,2                                  | 18,1                     | 10,2                     | 14,1                      | 1,3                         | 2385                                       |
|         | Mauguio                                | France  | 2011  | Mau11  | 43,61            | 3,98              | 13              | 14/05/2011           | 7,5                                  | 23,4                     | 14,2                     | 18,8                      | 1,6                         | 3105                                       |
|         | Murony                                 | Hungary | 2013  | Mur13  | 46,78            | 21,05             | 85              | 22/05/2013           | 6,7                                  | 22,6                     | 11,1                     | 16,9                      | 2,1                         | 2715                                       |
|         | Nerac                                  | France  | 2011  | Ner11  | 44,17            | 0,31              | 40              | 13/05/2011           | 6,9                                  | 25,0                     | 11,3                     | 18,2                      | 1,8                         | 2910                                       |
|         | Nerac                                  | France  | 2012  | Ner12  | 44,17            | 0,31              | 40              | 28/05/2012           | 7,4                                  | 26,4                     | 10,1                     | 18,3                      | 1,5                         | 3000                                       |
| Nerac   | France                                 | 2013    | Ner13 | 44,17  | 0,31             | 40                | 15/05/2013      | 7,4                  | 24,0                                 | 10,5                     | 17,3                     | 1,7                       | 2850                        |                                            |
| F       | Mauguio                                | France  | 2016  | Mau16  | 43,61            | 3,98              | 13              | 16/05/2016           | 7,2                                  | 23,2                     | 14,3                     | 18,8                      | 1,3                         | 3105                                       |

All environmental variables are calculated in the period between sowing and ligulation of the last leaf for the reference genotype B73\_H. T<sub>max</sub> : Mean of daily maximum temperature. T<sub>min</sub> : mean of daily minimum temperature. T<sub>mean</sub> : mean of T<sub>max</sub> and T<sub>min</sub>. VPD<sub>max</sub> : mean of daily maximum vapor pressure deficit. RAD<sub>sum</sub> : sum of daily radiation.

**Supplementary Table S4.** Parameter values for the 14 hybrids used in model validation

| Genotype | Measured model parameters                  |                         |                                              |                         |                               |                                               |                                               |                            |             |                                          |
|----------|--------------------------------------------|-------------------------|----------------------------------------------|-------------------------|-------------------------------|-----------------------------------------------|-----------------------------------------------|----------------------------|-------------|------------------------------------------|
|          | <i>Platform</i>                            |                         |                                              |                         |                               |                                               |                                               | <i>Field</i>               |             | <i>Field &amp; Platform</i>              |
|          | $a_{\text{tip}}$<br>°Cd leaf <sup>-1</sup> | $b_{\text{tip}}$<br>°Cd | $a_{\text{ll1}}$<br>°Cd ligule <sup>-1</sup> | $b_{\text{ll1}}$<br>°Cd | $a_6$<br>mm °Cd <sup>-1</sup> | $b$<br>mm °Cd <sup>-1</sup> kPa <sup>-1</sup> | $c$<br>mm °Cd <sup>-1</sup> MPa <sup>-1</sup> | $N_{\text{final}}$<br>leaf | $W_6$<br>mm | $r_{\text{RAD}}$<br>mm °MJ <sup>-1</sup> |
| B104_H   | 42                                         | -64                     | 67                                           | 125                     | 3.57                          | -1.36                                         | 5.01                                          | 17                         | 49          | 19                                       |
| B73_H    | 51                                         | -49                     | 86                                           | 137                     | 3.19                          | -1.17                                         | 3.52                                          | 16                         | 41          | 34                                       |
| B97_H    | 47                                         | -63                     | 72                                           | 132                     | 3.93                          | -1.51                                         | 6.19                                          | 16                         | 58          | 28                                       |
| EC136_H  | 43                                         | -56                     | 66                                           | 123                     | 3.45                          | -1.32                                         | 4.74                                          | 15                         | 46          | 18                                       |
| EZ38_H   | 41                                         | -42                     | 68                                           | 134                     | 4.63                          | -1.61                                         | 7.02                                          | 16                         | 48          | 22                                       |
| F252_H   | 40                                         | -66                     | 64                                           | 106                     | 3.73                          | -1.54                                         | 6.49                                          | 15                         | 47          | 26                                       |
| F353_H   | 43                                         | -59                     | 63                                           | 133                     | 4.23                          | -1.49                                         | 6.04                                          | 15                         | 41          | 26                                       |
| F712_H   | 41                                         | -46                     | 55                                           | 129                     | 3.75                          | -1.41                                         | 5.42                                          | 17                         | 41          | 18                                       |
| F912_H   | 43                                         | -65                     | 68                                           | 117                     | 4.09                          | -1.45                                         | 5.74                                          | 15                         | 47          | 34                                       |
| Lo1123_H | 40                                         | -58                     | 63                                           | 119                     | 4.11                          | -1.54                                         | 6.50                                          | 16                         | 48          | 38                                       |
| P465P_H  | 46                                         | -59                     | 69                                           | 138                     | 3.99                          | -1.35                                         | 4.96                                          | 15                         | 54          | 32                                       |
| PH207_H  | 43                                         | -60                     | 64                                           | 119                     | 3.07                          | -1.28                                         | 4.41                                          | 15                         | 42          | 11                                       |
| PHG83_H  | 41                                         | -46                     | 67                                           | 125                     | 3.05                          | -1.50                                         | 6.15                                          | 17                         | 44          | 13                                       |
| W64A_H   | 38                                         | -37                     | 61                                           | 130                     | 3.15                          | -1.29                                         | 4.44                                          | 16                         | 45          | 22                                       |
